# Supplementary material for: A qualitative exploration of university students’ perspectives on distance education in Jordan: An application of Moore’s theory of transactional distance
Source: Frontiers journal article supplement (doi:10.3389/feduc.2022.960660), 2022-09-26
Supplement: Data_Sheet_1.PDF [file Data_Sheet_1.PDF]

## **S1 Appendix.** Interview Guide

- 1- May you introduce yourself, please?
- 2- Please describe your feelings the moment you realized that academic institutions will be closed as per the COVID-19 mitigation strategy in Jordan.
- 3- Please explain to what extent shifting from on-campus education to online distance education impacted your studies. And how do you describe this impact in your own words?
- 4- Describe any challenges you have experienced in your interaction with your instructor and colleagues during distance education.
- 5- How do you describe the web-based methods/programs that were used to deliver the study materials to you through distance education?
- 6- In your opinion, what are the advantages of the technological mediums in distance education?  
What are the disadvantages too?
- 7- What do you think about the suitability of the learning materials provided to you through distance learning (in terms of quantity and quality)? Please describe in detail and in comparison, to on-campus education too.
- 8- Do you have any further information you would like to add?
